# Supplementary material for: Influenza Virus Genomic Surveillance, Arizona, USA, 2023–2024
Source: MDPI journal article supplement (doi:10.3390/v16050692), 2024-04-27
Supplement: s1 [file s1]

## Supplementary Tables

**Supplementary Table S1:** Frequency of non-synonymous amino acid substitutions in influenza A(H1N1)pdm09 virus HA gene found in Arizona genome sequences compared to cell culture and recombinant-based WHO vaccine reference Influenza A/Wisconsin/67/2022(H1N1)pdm09 (OQ203982).

| <b>Mutation</b> | <b>Antigenic site</b> | <b>Frequency<br/>Unvaccinated<br/>(n=67)</b> | <b>Frequency<br/>Vaccinated<br/>(n=8)</b> |
|-----------------|-----------------------|----------------------------------------------|-------------------------------------------|
| D35E            |                       | 1.5%                                         | 0.0%                                      |
| D35Y            |                       | 1.5%                                         | 0.0%                                      |
| N38D            |                       | 3.0%                                         | 0.0%                                      |
| R45K            |                       | 40.3%                                        | 62.5%                                     |
| V47I            |                       | 3.0%                                         | 0.0%                                      |
| E68K            |                       | 1.5%                                         | 0.0%                                      |
| S69P            |                       | 3.0%                                         | 0.0%                                      |
| A73T            |                       | 1.5%                                         | 0.0%                                      |
| R74I            |                       | 1.5%                                         | 0.0%                                      |
| N84S            |                       | 3.0%                                         | 0.0%                                      |
| S85P            |                       | 1.5%                                         | 0.0%                                      |
| D94N            | -                     | 7.5%                                         | 0.0%                                      |
| I96T            |                       | 1.5%                                         | 0.0%                                      |
| I96V            |                       | 1.5%                                         | 0.0%                                      |
| E103G           | -                     | 1.5%                                         | 0.0%                                      |
| R113K           |                       | 16.4%                                        | 12.5%                                     |
| I116M           |                       | 1.5%                                         | 0.0%                                      |
| T120A           |                       | 17.9%                                        | 0.0%                                      |
| N130K           |                       | 1.5%                                         | 0.0%                                      |
| S137P           | Ca2                   | 17.9%                                        | 0.0%                                      |
| R142K           | Ca2                   | 13.4%                                        | 0.0%                                      |
| F144L           |                       | 1.5%                                         | 0.0%                                      |
| K146E           |                       | 1.5%                                         | 0.0%                                      |
| K169Q           |                       | 4.5%                                         | 0.0%                                      |
| G170E           |                       | 0.0%                                         | 12.5%                                     |
| A216T           |                       | 14.9%                                        | 0.0%                                      |
| Q223K           | Ca2                   | 13.4%                                        | 0.0%                                      |

|       |   |       |       |
|-------|---|-------|-------|
| R223Q |   | 76.1% | 62.5% |
| E260D |   | 19.4% | 0.0%  |
| A261T |   | 1.5%  | 0.0%  |
| A261V |   | 1.5%  | 0.0%  |
| A277T |   | 20.9% | 0.0%  |
| I286M |   | 0.0%  | 12.5% |
| V295I |   | 1.5%  | 0.0%  |
| K302E |   | 7.5%  | 12.5% |
| S309R |   | 1.5%  | 0.0%  |
| T342A | - | 3.0%  | 0.0%  |
| D356E |   | 19.4% | 0.0%  |
| D356N |   | 1.5%  | 0.0%  |
| I404V |   | 0.0%  | 12.5% |
| F415L |   | 1.5%  | 0.0%  |
| V418I |   | 7.5%  | 0.0%  |
| V427I |   | 17.9% | 12.5% |
| T434I |   | 1.5%  | 0.0%  |
| D436N |   | 1.5%  | 0.0%  |
| R450K |   | 1.5%  | 0.0%  |
| H451N |   | 19.4% | 0.0%  |
| K454R |   | 1.5%  | 0.0%  |
| K480R |   | 4.5%  | 0.0%  |
| D501N |   | 1.5%  | 0.0%  |
| I510V |   | 1.5%  | 0.0%  |
| L526M |   | 1.5%  | 0.0%  |
| I533V |   | 7.5%  | 0.0%  |

**Supplementary Table S2:** Frequency of non-synonymous amino acid substitutions in influenza A(H3N2) virus HA gene found in Arizona genome sequences compared to cell culture and recombinant-based WHO vaccine reference Influenza A/Darwin/6/2021(H3N2) (OQ718999).

| <b>Mutation</b> | <b>Antigenic site</b> | <b>Frequency<br/>Unvaccinated<br/>(n=22)</b> | <b>Frequency<br/>Vaccinated<br/>(n=1)</b> |
|-----------------|-----------------------|----------------------------------------------|-------------------------------------------|
|-----------------|-----------------------|----------------------------------------------|-------------------------------------------|

|       |   |        |        |
|-------|---|--------|--------|
| I3L   |   | 4.5%   | 0.0%   |
| S9G   |   | 9.1%   | 0.0%   |
| P21L  |   | 4.5%   | 0.0%   |
| I25V  |   | 9.1%   | 0.0%   |
| G62E  |   | 13.6%  | 0.0%   |
| N63D  | E | 9.1%   | 0.0%   |
| R92G  |   | 4.5%   | 0.0%   |
| S95G  |   | 4.5%   | 0.0%   |
| S95N  |   | 4.5%   | 0.0%   |
| Y105H |   | 4.5%   | 0.0%   |
| N122D | A | 90.9%  | 0.0%   |
| S145N | A | 13.6%  | 0.0%   |
| I195F |   | 100.0% | 100.0% |
| K207R |   | 18.2%  | 0.0%   |
| A212S |   | 4.5%   | 0.0%   |
| I214T | B | 4.5%   | 0.0%   |
| N216D |   | 4.5%   | 0.0%   |
| I223V |   | 4.5%   | 0.0%   |
| S228L | B | 4.5%   | 0.0%   |
| I260M |   | 4.5%   | 0.0%   |
| K276E |   | 86.4%  | 100.0% |
| S287G | - | 4.5%   | 0.0%   |
| N298S |   | 4.5%   | 0.0%   |
| V309I |   | 4.5%   | 0.0%   |
| V347M |   | 9.1%   | 0.0%   |
| E390K |   | 4.5%   | 0.0%   |
| V413I |   | 4.5%   | 0.0%   |
| I418V |   | 4.5%   | 0.0%   |
| K452R |   | 4.5%   | 0.0%   |
| V505I |   | 4.5%   | 0.0%   |
| I515V |   | 4.5%   | 0.0%   |
| M536V |   | 4.5%   | 0.0%   |

**Supplementary Table S3:** Frequency of non-synonymous amino acid substitutions in influenza B/Victoria virus HA gene found in Arizona genome sequences compared to cell culture and recombinant-based WHO vaccine reference Influenza B/Austria/1359417/2021 (B/Victoria) (EPI\_ISL\_2378894).

| <b>Mutation</b> | <b>Antigenic site</b> | <b>Frequency Unvaccinated (n=28)</b> | <b>Frequency Vaccinated (n=2)</b> |
|-----------------|-----------------------|--------------------------------------|-----------------------------------|
| V30I            |                       | 3.6%                                 | 0.0%                              |
| R86K            | -                     | 3.6%                                 | 0.0%                              |
| V93A            |                       | 10.7%                                | 0.0%                              |
| E134G           |                       | 3.6%                                 | 0.0%                              |
| E134K           |                       | 32.1%                                | 50.0%                             |
| D135N           | -                     | 7.1%                                 | 0.0%                              |
| M162L           |                       | 14.3%                                | 0.0%                              |
| T185A           |                       | 0.0%                                 | 50.0%                             |
| E186K           |                       | 96.4%                                | 50.0%                             |
| D200E           | B1                    | 96.4%                                | 100.0%                            |
| E201G           |                       | 3.6%                                 | 0.0%                              |
| E201K           |                       | 17.9%                                | 0.0%                              |
| A205V           | B1                    | 10.7%                                | 0.0%                              |
| V255M           |                       | 3.6%                                 | 0.0%                              |
| W277R           |                       | 10.7%                                | 0.0%                              |
| R501K           |                       | 3.6%                                 | 0.0%                              |
| N534H           |                       | 3.6%                                 | 0.0%                              |
